# Supplementary material
Source: publisher figshare collection journal article supplement (https://acs.figshare.com/ndownloader/files/9652741)
Supplement: Supplementary file 1 [file 9652741]

## Supporting Information

### **1,4-Dioxane Biodegradation by *Mycobacterium dioxanotrophicus***

#### **PH-06 Is Associated with a Group-6 Soluble Di-iron Monooxygenase**

Ya He<sup>a</sup>, Jacques Mathieu<sup>a</sup>, Yu Yang<sup>a</sup>, Pingfeng Yu<sup>a</sup>, Marcio L. B. da Silva<sup>a</sup>, Pedro J. J. Alvarez<sup>a#</sup>

<sup>a</sup> Department of Civil and Environmental Engineering, Rice University, Houston, TX, 77005,  
USA

# Corresponding author: Pedro J. J. Alvarez

Email: alvarez@rice.edu; Phone: +1-7133485903; Fax: +1-7133485268

## Table of Contents

### Materials and Methods

*Total RNA extraction*

*Quantification of gene expression*

*Design and evaluation of the *prmA* primer/probe set*

### Results and Discussion

*Biomarker testing results of the aquifer*

### Figures

**Figure S1.** Monod plot for the dioxane degradation by *Mycobacterium dioxanotrophicus* PH-06 and *Pseudonocardia dioxanivorans* CB1190.

**Figure S2.** Inhibition by acetylene on biodegradation of dioxane by *Mycobacterium dioxanotrophicus* PH-06.

**Figure S3.** Gene expression fold of *prmABCD* in PH-06 pure cultures grown on propane relative to glucose or acetate.

**Figure S4.** Inhibition of dioxane degradation by THF.

**Figure S5.** Alignment of the amino acid sequences of the alpha hydroxylase subunits for different groups of SDIMO.

**Figure S6.** Composition of the microbial communities in Consortium C and D.

### Tables

**Table S1.** Specificity and coverage tests for the designed *prmA* primer/probe set.

**Table S2.** Primers used in RT-qPCR to determine the relative gene expression levels of *prmABCD* under two different treatments.

**Table S3.** Properties of the enriched consortia and dioxane impacted aquifer.

**Table S4.** Monooxygenase genes upregulated during growth on dioxane relative to glucose shown by RNA-seq.

**Table S5.** Properties of the designed *prmA* primer/probe set.

**Table S6.** Detection limit of various catabolic genes.

## Material and Methods

### *Total RNA extraction*

PH-06 cells in exponential growth phase (after half of the added substrates were consumed) were used to extract total RNA for RNA sequencing (RNA-seq) and reverse transcription quantitative polymerase chain reaction (RT-qPCR). RNAlater Bacteria Reagent (Qiagen, Hilden, Germany) was added to each culture prior to extraction according to the manufacturer's instructions, and cultures were then incubated at room temperature (25 °C) for 5 min to stabilize the RNA before further processing. The stabilized bacterial cultures were centrifuged for 10 min at 5000 × g. The supernatant was decanted and the pellets were immersed and lysed in an appropriate volume of Buffer RLT (RNase Mini Kit, Qiagen, Hilden, Germany) with 2-mercaptoethanol (Sigma-Aldrich, St. Louis, MO, USA). After incubation for 5 min at room temperature, the lysed biomass in Buffer RLT was transferred into MicroRNA Bead Tubes (UltraClean<sup>®</sup> Microbial RNA Isolation Kit, MO BIO, Carlsbad, CA, USA) containing 0.25 g of beads and vortexed at maximum speed for 5 min using a Vortex-Genie<sup>®</sup> 2 (MO BIO, Carlsbad, CA, USA) to further homogenize the cell lysate. Then the lysis solution was centrifuged at maximum speed for 30 s and the supernatant was transferred into a new tube and the total RNA was purified using an RNase Mini Kit (Qiagen, Hilden, Germany). On-column DNA digestion was performed during the purification using an RNase-Free DNase Set (Qiagen, Hilden, Germany) to get high quality of RNA.

### *Quantification of gene expression*

The  $2^{-\Delta\Delta C_T}$  method was used to quantify differential gene expression, and the results were analyzed with SDS 1.3.1.<sup>1</sup> The calculation equation is:

$$\Delta\Delta C_{T, \text{Target gene}} = (C_{T, \text{Target gene}} - C_{T, \text{Housekeeping gene}})_{\text{Treatment}} - (C_{T, \text{Target gene}} - C_{T, \text{Housekeeping gene}})_{\text{Control}}$$

(C<sub>T</sub> is cycle threshold, treatment is dioxane or THF, and control is glucose or acetate). This value is used to calculate the expression fold change of the target gene, as follows:

$$\text{Expression fold change} = 2^{-\Delta\Delta C_T}$$

Here, a housekeeping gene (16S rRNA of PH-06) was used as an internal standard for RT-qPCR.

### ***Design and evaluation of the *prmA* primer/probe set***

Amino acid sequences of alpha hydroxylase subunits from different groups of SDIMOs were aligned using Clustal X 2.0<sup>2</sup> and the phylogenetic tree was then visualized using TreeGraph2.<sup>3</sup> Partial DNA sequence (from 200 to 600) of the *prmA* gene of PH-06 was used as the input sequence in Primer Quest (Integrated DNA Technologies, Coraville, IA) to generate a series of possible primer/probe sets that satisfied the design criteria for Taqman assays. After manual comparison and adjustment, the final primer/probe set was chosen. The amplicon was 103 bp in length.

The sequences (5'-3') of 16S rRNA primer/probe set are: Forward primer (CGGTGAATACGTTCYCGG), Reverse primer (GGWTACCTTGTTACGACTT), and Probe (FAM-CTTGTACACACCGCCCGTC-BHQ1).<sup>4</sup>

The genome size of PH-06 is 8.08 Mb<sup>5</sup> and DNA molecule weight is  $9.12 \times 10^{11}$  bp /ng of DNA [i.e.,  $(6.022 \times 10^{14} \text{ Da/ng of DNA}) / (660 \text{ Da/bp})$ ]. The gene copy numbers were calculated using the following equation:

$$\frac{\text{gene copies}}{\mu L} = \left( \frac{\text{ng of DNA}}{\mu L} \right) \times \left( \frac{9.12 \times 10^{11} \text{ bp}}{\text{ng of DNA}} \right) \times \left( \frac{\text{genome}}{8.08 \times 10^6 \text{ bp}} \right) \times \left( \frac{\text{gene copies}}{\text{genome}} \right)$$

The overall detection limit (DL) of *prmA* biomarker (in copy numbers/ml of bacterial culture or aquifer materials) was determined by the following equation:

$$\text{Overall DL} = \frac{\text{qPCR instrument DL}}{\text{DNA recovery}} \times \text{Proportion of DNA used in qPCR reaction}$$

qPCR instrument DL is identified as the minimum detectable copy number when seven sequential analyses are successful.

### ***Dioxane degradation rates***

The dioxane degradation experiments with four consortia (Table S3) were conducted in 250-mL bottles amended with 100-mL AMS medium with an initial dioxane concentration of 500 mg/L, while shaking on a Digital Linear Shaker (Scilogex, Rocky Hill, CT, USA) at 150 rpm (T=30 °C, pH=7). For the dioxane impacted aquifer, it was a natural attenuation experiment (no nutrients were added). The aquifer is from a dioxane impacted site in Seattle, WA. The dioxane concentration was about 300 µg/L. The natural attenuation experiment was conducted at 15 °C to mimic the actual average groundwater temperature at this site.

## **Results and Discussion**

### ***Biomarker testing results of the aquifer***

No *prmA* gene was detected in the dioxane impacted aquifer. The detection limit is 6000 – 7000 gene copies/ml aquifer, which is higher than the culture detection limit (3000-4000 gene copies/ml culture) because the DNA recovery from aquifer is lower than that from cultures. The abundance of 16S rRNA is 7.89 (log) gene copies per ml aquifer.

## Supporting Figures

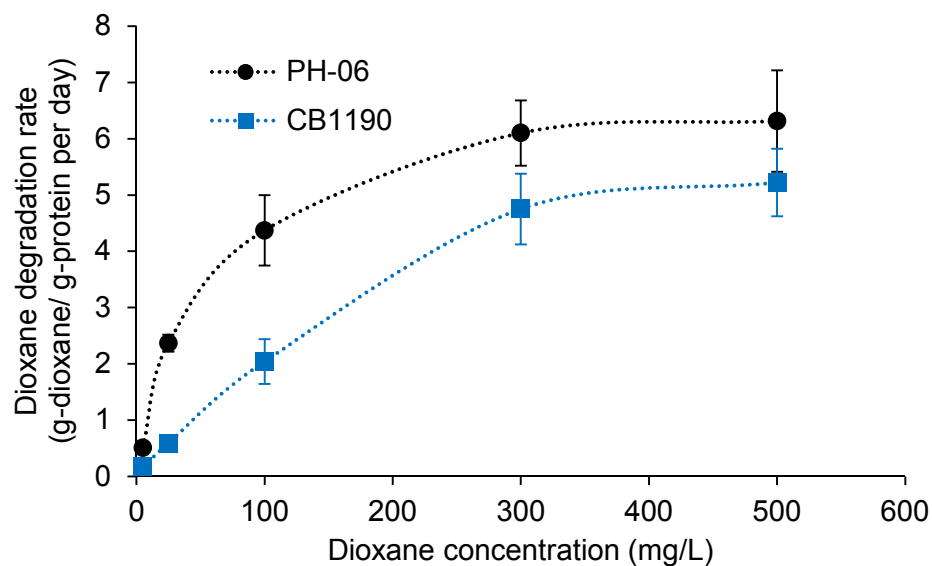

**Figure S1.** Monod plot for the dioxane degradation by *Mycobacterium dioxanotrophicus* PH-06 ( $K_s = 78 \pm 10$  mg/L,  $Y = 0.16$  g protein/g dioxane) and *Pseudonocardia dioxanivorans* CB1190 ( $K_s = 145 \pm 17$  mg/L,  $Y = 0.11$  g protein/ g dioxane). Our data for CB1190 are consistent with the previously reported values ( $K_s = 160 \pm 44$  mg/L,  $Y = 0.09$  g protein/ g dioxane).<sup>6</sup>

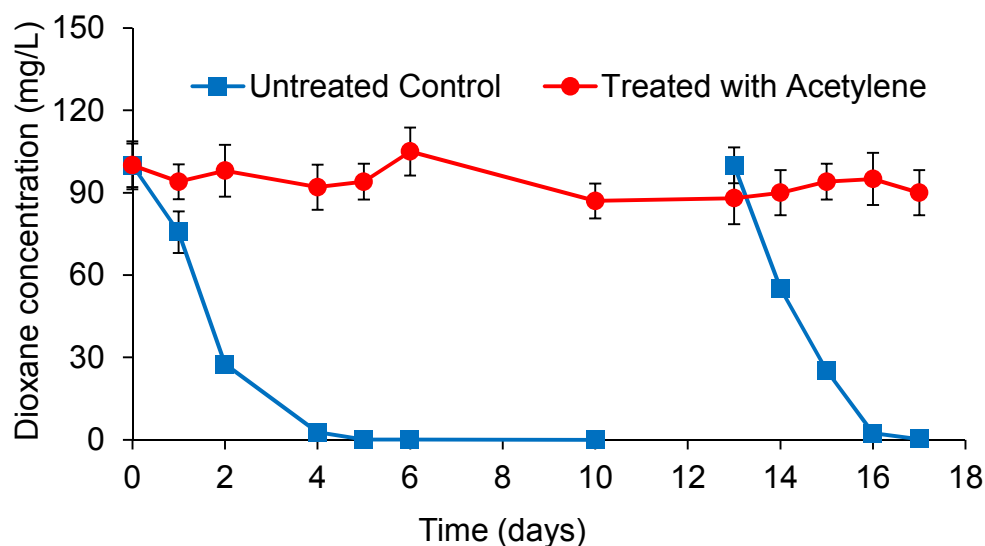

**Figure S2.** Inhibition by acetylene on biodegradation of dioxane by *Mycobacterium dioxanotrophicus* PH-06. The degradation capability was significantly inhibited by acetylene (8% in headspace) and was not recovered after the removal of acetylene. The initial dioxane and biomass concentration (measured as protein density) were 100 mg/L and 20 mg/L, respectively. On Day 13, acetylene was removed and 100 mg/L of dioxane was added into the control. Error bars represent  $\pm$  one standard deviation from the mean of triplicate measurements.

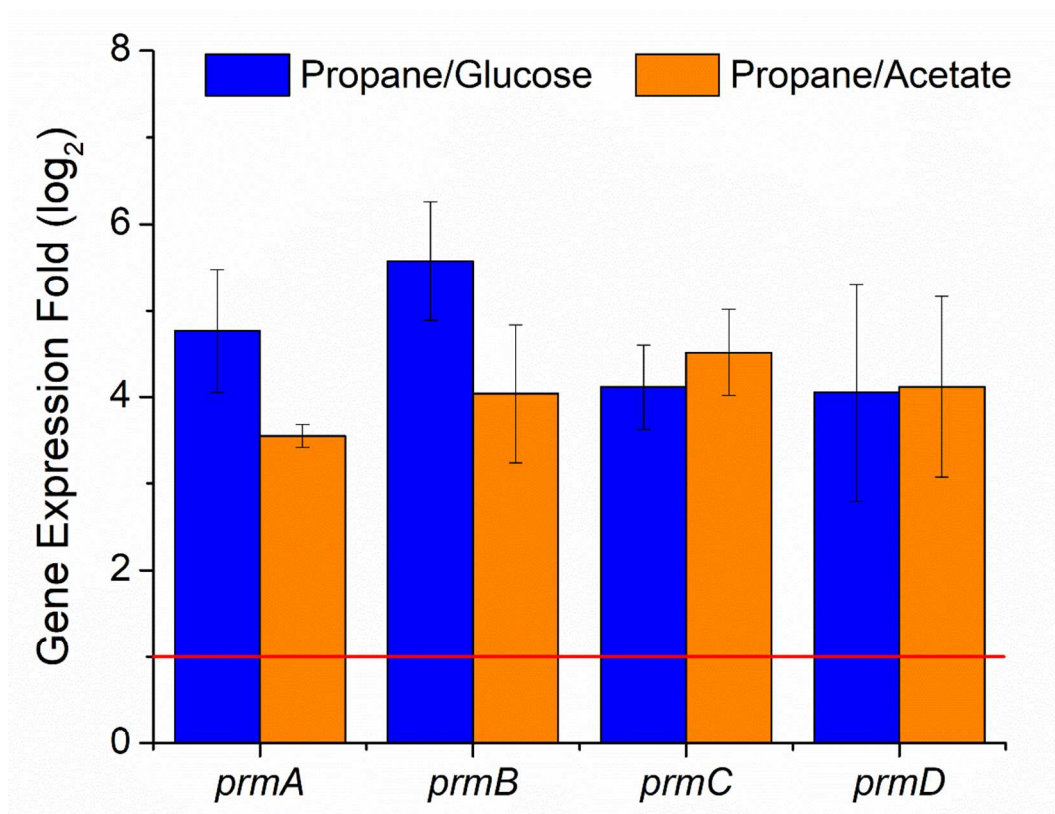

**Figure S3.** Gene expression fold of *prmA**BCD* in PH-06 pure cultures grown on propane relative to glucose or acetate. 16S rRNA gene of PH-06 was used as the housekeeping gene for error control among samples. The red horizontal lines indicated upregulation criteria (two-fold gene expression change).



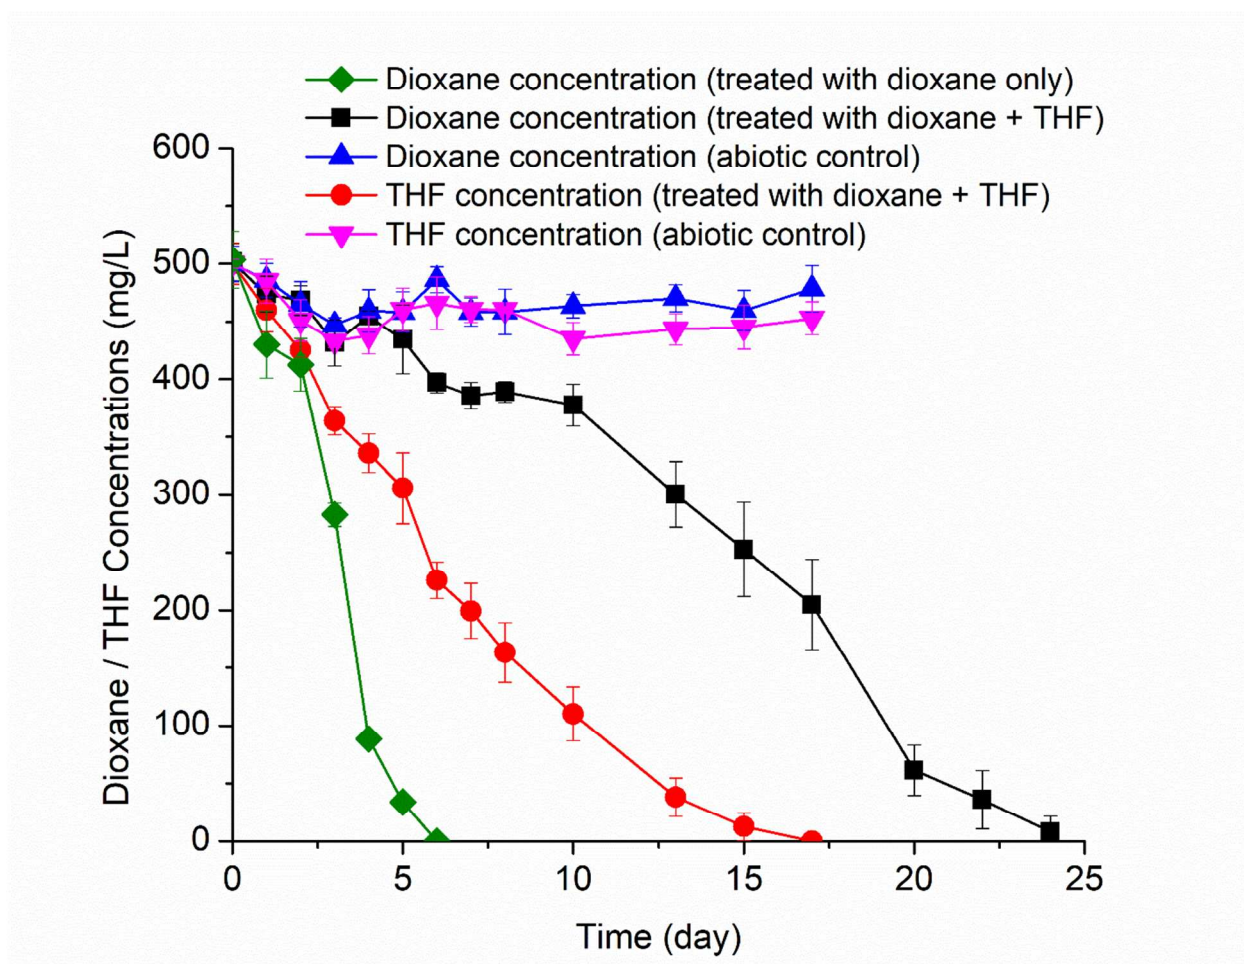

**Figure S4.** Inhibition of dioxane degradation by THF. Dioxane was degraded much faster when present alone than with THF. When dioxane and THF were added concurrently, the degradation of dioxane was inhibited initially, but after THF was consumed (80% degraded to 100 mg/L), dioxane was more rapidly degraded.



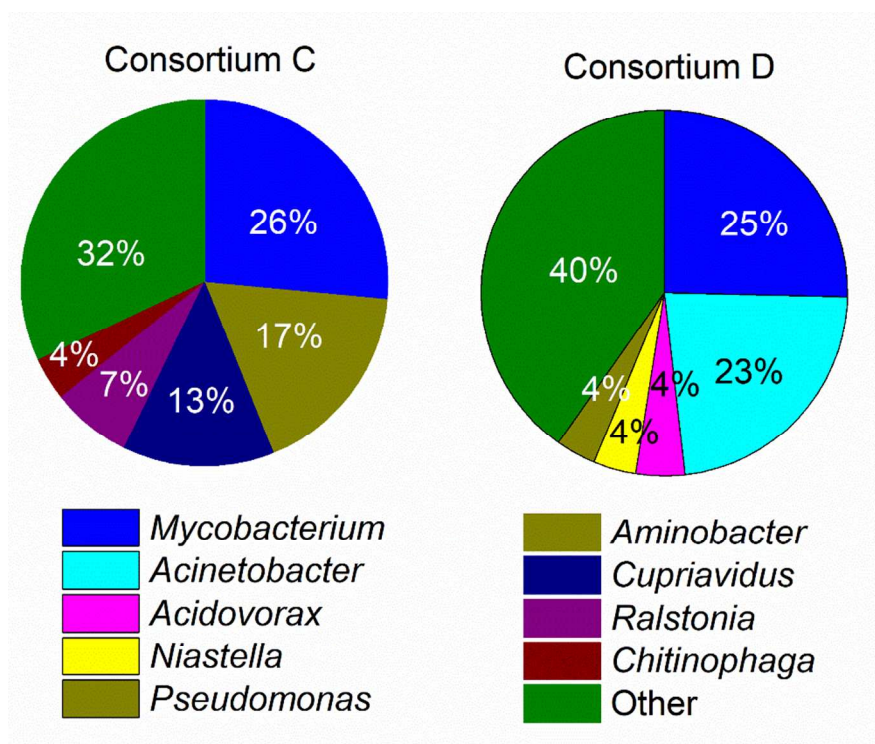

**Figure S6.** Composition of the microbial communities in Consortium C and D. The sum of all bacteria genera representing less than 3.5% of total community is indicated as “Other”. The composition of the microbial communities in Consortium A and B can be found in a paper<sup>7</sup> published on the journal *Microbial Biotechnology* (DOI: 10.1111/1751-7915.12850).

## Supporting Tables

**Table S1.** Specificity and coverage tests for the designed *prmA* primer/probe set.

| Bacterial Strain                                | Dioxane degrader <sup>a</sup> | Gene name  | Encoding enzyme <sup>b</sup> | SDIMO group | <i>prmA</i> detection <sup>c</sup> |
|-------------------------------------------------|-------------------------------|------------|------------------------------|-------------|------------------------------------|
| <i>Mycobacterium dioxanotrophicus</i> PH-06     | +                             | <i>prm</i> | Dioxane MO                   | 6           | +                                  |
| <i>Rhodococcus wratislaviensis</i> IFP 2016     | -                             | <i>prm</i> | Propane MO                   | 6           | -                                  |
| <i>Mycobacterium sp.</i> ENV421                 | +                             | <i>prm</i> | Propane MO                   | 6           | -                                  |
| <i>Mycobacterium chubuense</i> NBB4             | -                             | <i>smo</i> | Propane MO                   | 6           | -                                  |
| <i>Pseudonocardia tetrahydrofuranoxydans</i> K1 | +                             | <i>thm</i> | Tetrahydrofuran MO           | 5           | -                                  |
| <i>Pseudonocardia dioxanivorans</i> CB1190      | +                             | <i>thm</i> | Tetrahydrofuran MO           | 5           | -                                  |
| <i>Rhodococcus jostii</i> RHA1                  | +                             | <i>prm</i> | Propane MO                   | 5           | -                                  |
| <i>Mycobacterium chubuense</i> NBB4             | -                             | <i>etn</i> | Ethene MO                    | 4           | -                                  |
| <i>Mycobacterium chubuense</i> NBB4             | -                             | <i>smo</i> | Soluble methane MO           | 3           | -                                  |
| <i>Pseudomonas putida</i> CF600                 | -                             | <i>dmp</i> | Phenol HD                    | 2           | -                                  |
| <i>Pseudonocardia dioxanivorans</i> CB1190      | +                             | <i>phm</i> | Phenol HD                    | 1           | -                                  |
| <i>Mycobacterium vanbaalenii</i> PYR-1          | -                             | <i>nid</i> | PAH DO                       | -           | -                                  |
| <i>Pseudomonas putida</i> F1                    | -                             | <i>tod</i> | Toluene DO                   | -           | -                                  |
| <i>Escherichia coli</i> K-12                    | -                             | -          | -                            | -           | -                                  |
| Bacteriophage $\lambda$                         | -                             | -          | -                            | -           | -                                  |

<sup>a</sup> Plus and minus signs indicate whether a specific strain can degrade dioxane or not, respectively, including metabolism and cometabolism.

<sup>b</sup> Abbreviations: MO, monooxygenase; HD, hydroxylase; DO, dioxygenase; PAH, polycyclic aromatic hydrocarbon.

<sup>c</sup> Plus and minus signs indicate positive and negative detection, respectively.

**Table S2.** Primers used in RT-qPCR to determine the relative gene expression levels of *prmABCD* under two different treatments.

| Targeted Gene | Forward Primer (5'-3')    | Reverse Primer (5'-3')    |
|---------------|---------------------------|---------------------------|
| <i>prmA</i>   | TTT CCA GGG CTC GAC TTA   | TCC AAC CGC TCG ATG TA    |
| <i>prmB</i>   | GCAGCGTCCTTACATCAA        | CGCCAACGCTTCGTAATA        |
| <i>prmC</i>   | CCAGGCGACCGTGCATTA        | GTCTCGAGCAGGAAGAACGTG     |
| <i>prmD</i>   | GGC GTC AAC CTG CAA TA    | TCC TCG GAA TCG CAT AGA   |
| 16S rRNA      | CAG GAC GCT GGT AGA GAT A | CGG GAC TTA ACC CAA CAT C |

**Table S3.** Properties of the enriched consortia and dioxane impacted aquifer.

| Name                     | Enriched source            | Dioxane degrading rate<br>(g dioxane/g protein/day) |
|--------------------------|----------------------------|-----------------------------------------------------|
| Consortium A             | Uncontaminated garden soil | 7.1                                                 |
| Consortium B             | Uncontaminated garden soil | 5.7                                                 |
| Consortium C             | Dioxane impacted site      | 3.02                                                |
| Consortium D             | Wastewater sludge          | 3.8                                                 |
| Dioxane impacted aquifer | -                          | 0                                                   |

**Table S4.** Monooxygenase genes upregulated during growth on dioxane relative to glucose shown by RNA-seq<sup>a</sup>.

| Gene ID <sup>b</sup> | Reference <sup>c</sup> | Similarity <sup>d</sup> | Gene product <sup>e</sup>                    | Replicon <sup>f</sup> | Expression fold change |
|----------------------|------------------------|-------------------------|----------------------------------------------|-----------------------|------------------------|
| <b>BTO20_RS38210</b> | <b>WP_005572960</b>    | <b>94%</b>              | <b>hydroxylase alpha chain (<i>prmA</i>)</b> | <b>P3</b>             | <b>6.5</b>             |
| <b>BTO20_RS38215</b> | <b>WP_005572958</b>    | <b>90%</b>              | <b>hydroxylase beta chain (<i>prmB</i>)</b>  | <b>P3</b>             | <b>8.1</b>             |
| <b>BTO20_RS38220</b> | <b>WP_014805364</b>    | <b>93%</b>              | <b>coupling protein (<i>prmC</i>)</b>        | <b>P3</b>             | <b>9.7</b>             |
| <b>BTO20_RS38225</b> | <b>WP_014805363</b>    | <b>90%</b>              | <b>reductase protein (<i>prmD</i>)</b>       | <b>P3</b>             | <b>10.7</b>            |
| BTO20_RS38395        | WP_014211353           | 90%                     | ammonia monooxygenase subunit C              | P3                    | 5.5                    |
| BTO20_RS38400        | WP_014211354           | 100%                    | ammonia monooxygenase subunit A              | P3                    | 7.5                    |
| BTO20_RS38405        | WP_014211355           | 94%                     | ammonia monooxygenase subunit B              | P3                    | 13.3                   |
| BTO20_RS22865        | KUH99082               | 84%                     | cyclohexanone monooxygenase                  | C                     | 13.9                   |
| BTO20_RS00055        | WP_083164222           | 88%                     | antibiotic biosynthesis monooxygenase        | C                     | 8.9                    |
| BTO20_RS27410        | WP_083164672           | 96%                     | 4-hydroxyacetophenone monooxygenase          | C                     | 8.6                    |
| BTO20_RS11965        | WP_083159483           | 94%                     | FAD-binding monooxygenase                    | C                     | 6.8                    |
| BTO20_RS26085        | WP_062831686           | 97%                     | alkane 1-monooxygenase                       | C                     | 5.8                    |
| BTO20_RS22540        | WP_095533860           | 98%                     | alkanesulfonate monooxygenase                | C                     | 4.7                    |
| BTO20_RS08645        | WP_083163302           | 99%                     | nitronate monooxygenase                      | C                     | 4.2                    |
| BTO20_RS31515        | WP_062827933           | 99%                     | cytochrome P450                              | C                     | 4.2                    |
| BTO20_RS24595        | WP_083165874           | 99%                     | FMNH <sub>2</sub> -dependent monooxygenase   | C                     | 4.0                    |
| BTO20_RS24130        | WP_091256594           | 89%                     | phenol 2-monooxygenase                       | C                     | 4.0                    |
| BTO20_RS25380        | WP_003208288           | 99%                     | dimethylaniline monooxygenase                | C                     | 3.3                    |
| BTO20_RS16950        | WP_018599938           | 100%                    | phenylalanine 4-monooxygenase                | C                     | 3.3                    |

<sup>a</sup> RNA sequence data were submitted to the GenBank database under accession number SRP116048.

<sup>b</sup> Gene ID: locus\_tag on GenBank.

<sup>c</sup> Reference: accession number of the reference protein used to ascribe the gene product.

<sup>d</sup> Similarity: similarity with the reference obtained by NCBI BLAST.

<sup>e</sup> Gene product: The upregulated four subunits of *prmABCD* were highlighted in bold.

<sup>f</sup> Replicon: C, Chromosome; P3, Plasmid\_3.

**Table S5.** Properties of the designed *prmA* primer/probe set.

| Probe/Primer   | Name              | Sequence (5'-3')                                 | Size | G+C (%) | T <sub>m</sub> |
|----------------|-------------------|--------------------------------------------------|------|---------|----------------|
| Forward primer | <i>prmA</i> _307F | ACTGCGATGCTGGTTGAC                               | 18   | 55.6    | 62             |
| Reverse primer | <i>prmA</i> _410R | TCAGGTACGCCTCCTGATT                              | 19   | 52.6    | 62             |
| Taqman Probe   | <i>prmA</i> _355P | /56-FAM/TTCCTCGCG/ZEN/<br>CAGATGATCGACG/3IABkFQ/ | 22   | 59      | 68             |



**Table S6.** Detection limit of various catabolic genes.

| Biomarker        | Targeted gene                      | Detection limit (reported)           | Detection limit (converted) <sup>a</sup> | Reference  |
|------------------|------------------------------------|--------------------------------------|------------------------------------------|------------|
| <i>prmA</i>      | propane monooxygenase              | $3 - 4 \times 10^3$ copies/ml        | $3 - 4 \times 10^3$ copies/ml            | This study |
| <i>dxmB</i>      | dioxane monooxygenase              | $2 \times 10^6$ copies/ L            | $2 \times 10^3$ copies/ ml               | 8          |
| <i>poxD</i>      | phenol-2-monooxygenase             | $2 \times 10^6$ copies/ L            | $2 \times 10^3$ copies/ ml               | 8          |
| <i>thmA</i>      | dioxane monooxygenase              | $7 - 8 \times 10^3$ copies/g of soil | $2.4 - 2.7 \times 10^4$ copies/ ml       | 9          |
| <i>pmoA</i>      | particulate methane monooxygenase  | $1.9 \times 10^4$ copies/g of soil   | $6.5 \times 10^4$ copies/ml              | 10         |
| PAH-RHD $\alpha$ | PAH-ring hydroxylating dioxygenase | $2 \times 10^3$ copies/g of soil     | $6.8 \times 10^3$ copies/ml              | 11         |
| <i>nahAc</i>     | naphthalene dioxygenase            | $5 \times 10^3$ copies/g of soil     | $1.7 \times 10^4$ copies/ml              | 12         |

<sup>a</sup> Gene copies per g-soil were converted to copies per mL of pore volume by multiplying the former by the soil or aquifer material bulk density and dividing by its porosity. Assuming a bulk density of 1.7 g/ ml<sup>13</sup> and a porosity of 0.5,<sup>14</sup> the conversion factor is 3.4 g of soil/ ml of pore water.

## References

1. Livak, K. J.; Schmittgen, T. D., Analysis of relative gene expression data using real-time quantitative PCR and the  $2^{-\Delta\Delta CT}$  method. *Methods* **2001**, *25*, 402-408.
2. Larkin, M. A.; Blackshields, G.; Brown, N.; Chenna, R.; McGettigan, P. A.; McWilliam, H.; Valentin, F.; Wallace, I. M.; Wilm, A.; Lopez, R., Clustal W and Clustal X version 2.0. *Bioinformatics* **2007**, *23*, 2947-2948.
3. Stöver, B. C.; Müller, K. F., TreeGraph 2: combining and visualizing evidence from different phylogenetic analyses. *BMC bioinformatics* **2010**, *11*, 7.
4. Suzuki, M. T.; Taylor, L. T.; DeLong, E. F., Quantitative analysis of small-subunit rRNA genes in mixed microbial populations via 5'-nuclease assays. *Appl. Environ. Microbiol.* **2000**, *66*, 4605-4614.
5. He, Y.; Wei, K.; Si, K.; Mathieu, J.; Li, M.; Alvarez, P. J., Whole-genome sequence of the 1,4-dioxane-degrading bacterium *Mycobacterium dioxanotrophicus* PH-06. *Genome Announc.* **2017**, *5*, e00625-17.
6. Mahendra, S.; Alvarez-Cohen, L., Kinetics of 1,4-dioxane biodegradation by monooxygenase-expressing bacteria. *Environ. Sci. Technol.* **2006**, *40*, 5435-5442.
7. He, Y.; Mathieu, J.; Silva, M. L. B. d.; Li, M.; Alvarez, P. J., 1,4-Dioxane degrading consortia can be enriched from uncontaminated soils: Prevalence of *Mycobacterium* and soluble di-iron monooxygenase genes. *Microb. Biotechnol.* **2017**. (Accepted) DOI: 10.1111/1751-7915.12850
8. Gedalanga, P. B.; Pornwongthong, P.; Mora, R.; Chiang, S.-Y. D.; Baldwin, B.; Ogles, D.; Mahendra, S., Identification of biomarker genes to predict biodegradation of 1, 4-dioxane. *Appl. Environ. Microbiol.* **2014**, *80*, 3209-3218.

9. Li, M.; Mathieu, J.; Liu, Y.; Van Orden, E. T.; Yang, Y.; Fiorenza, S.; Alvarez, P. J., The abundance of tetrahydrofuran/dioxane monooxygenase genes (*thmA/dxmA*) and 1,4-dioxane degradation activity are significantly correlated at various impacted aquifers. *Environ. Sci. Technol. Lett.* **2013**, *1*, 122-127.
10. Kolb, S.; Knief, C.; Stubner, S.; Conrad, R., Quantitative detection of methanotrophs in soil by novel *pmoA*-targeted real-time PCR assays. *Appl. Environ. Microbiol.* **2003**, *69*, 2423-2429.
11. Cébron, A.; Norini, M.-P.; Beguiristain, T.; Leyval, C., Real-time PCR quantification of PAH-ring hydroxylating dioxygenase (PAH-RHD<sub>α</sub>) genes from Gram positive and Gram negative bacteria in soil and sediment samples. *J Microbiol. Methods* **2008**, *73*, 148-159.
12. Park, J.-W.; Crowley, D. E., Dynamic changes in *nahAc* gene copy numbers during degradation of naphthalene in PAH-contaminated soils. *Appl. Microbiol. Biotechnol.* **2006**, *72*, 1322-1329.
13. Twum, E. K.; Nii-Annang, S., Impact of soil compaction on bulk density and root biomass of *Quercus petraea* L. at Reclaimed Post-Lignite Mining Site in Lusatia, Germany. *Appl. Environ. Soil Sci.* **2015**, *2015*.
14. Nimmo, J., Porosity and pore size distribution. *Encyclopedia of Soils in the Environment* **2004**, *3*, 295-303.
